# Supplementary material
Source: bioRxiv or medRxiv preprint supplement (https://www.biorxiv.org/highwire/filestream/120870/field_highwire_adjunct_files/2/397992-3.pdf)
Supplement: Supplementary file [file 397992-3.pdf]

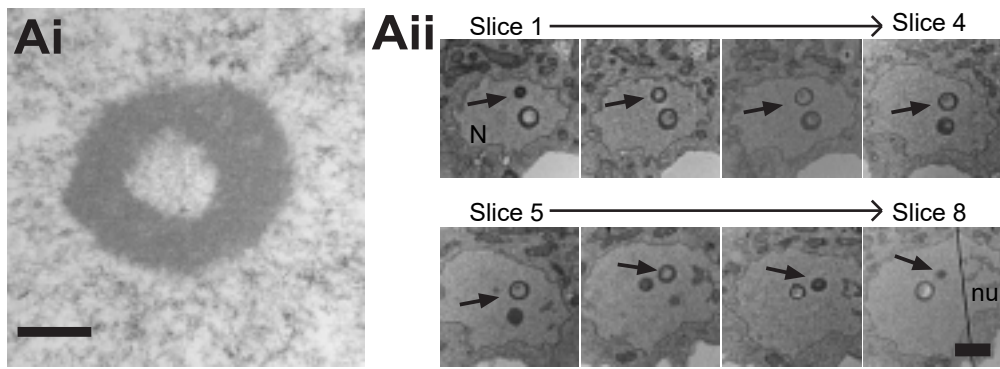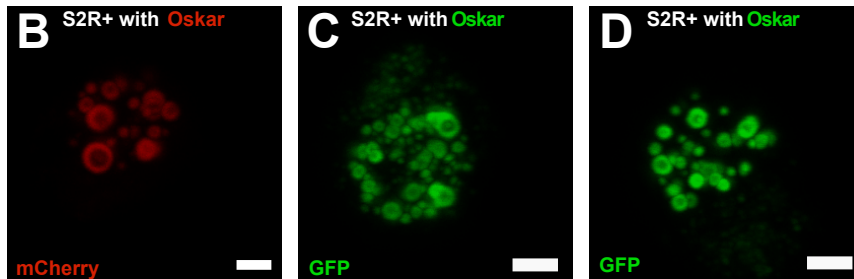

**E**

| Biological Process     | P value              | # genes | Example                                                              |
|------------------------|----------------------|---------|----------------------------------------------------------------------|
| Germ cell dev.         | $1.6 \times 10^{-9}$ | 37      | Dcp1, Vas, Not1, Kra, Caf1                                           |
| Post-transc. gene exp. | $8.9 \times 10^{-5}$ | 14      | Dcp1, Piwi, Caf1, Imp, Cup                                           |
| Pole cell dev.         | $3.3 \times 10^{-4}$ | 7       | Vas, Aub, Tud, Piwi, Rump                                            |
| Molecular function     | P value              | # genes | Example                                                              |
| mRNA binding           | $2.4 \times 10^{-5}$ | 11      | BicC, Dcp1, HnRNP-K, Clu, Rump, Nito                                 |
| RNA binding            | $1.7 \times 10^{-6}$ | 28      | BicC, Nat1, Piwi, Dcp1, HnRNP-K, Aub, Clu, Rump, Nito, Vas           |
| Nucleotide binding     | $1.2 \times 10^{-6}$ | 33      | Upf1, Khc, Klp3A, Mcm3, Mcm5, Dpa, Ids, Pont, Rump, Nito, Vas, Wispy |
| RNP complex binding    | $1.5 \times 10^{-4}$ | 6       | Mtor, Clu, EIF-2alpha, Kra                                           |
| Helicase               | $1.7 \times 10^{-6}$ | 8       | Upf1, Mcm3, Mcm5, Dpa, Ids, Pont, Vas                                |

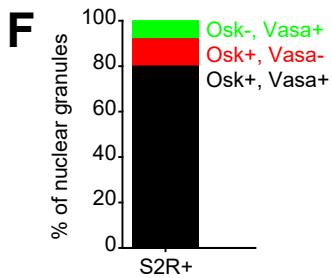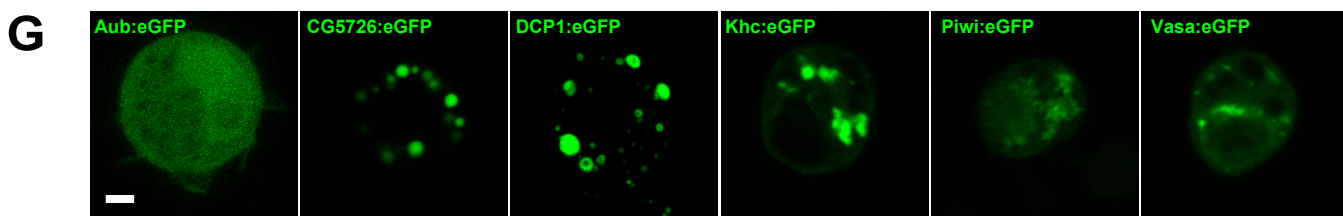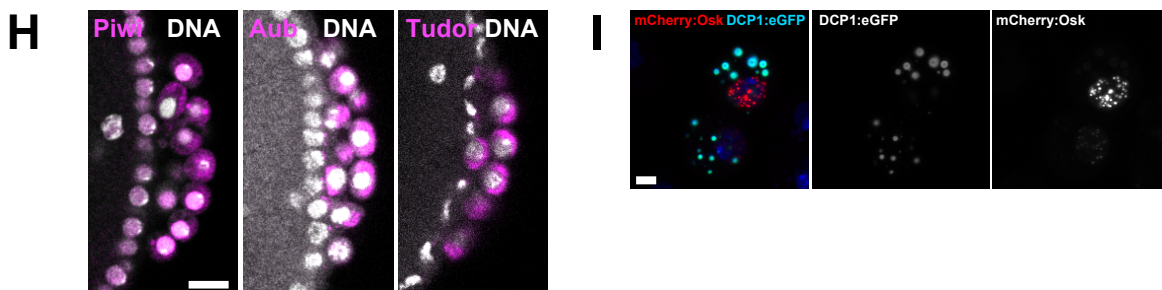

**Figure S3**
